# Supplementary material
Source: Royal Society of Chemistry journal article supplement (doi:10.1039/d6an00400h)
Supplement: d6an00400h1.pdf [file d6an00400h1.pdf]

# Supplementary Information

## **An intelligent DNzyme theranostic probe for *in situ* FTO bioimaging and real-time therapeutic efficacy evaluation in living cells**

Haorong Liu,<sup>a</sup> Shengrong Yu,<sup>\*ab</sup> Rong Feng,<sup>a</sup> Jingwen Chen,<sup>a</sup> Gege Xie,<sup>a</sup> Xiangwu Wu,<sup>a</sup>  
Tao Zhang,<sup>a</sup> Jian He,<sup>a</sup> Yong-Xiang Wu,<sup>\*ab</sup> and Keqi Tang<sup>\*ab</sup>

<sup>a</sup> Institute of Mass Spectrometry, Zhejiang Engineering Research Center of Advanced Mass spectrometry and Clinical Application, School of Materials Science and Chemical Engineering, Ningbo University, Ningbo, Zhejiang 315211, China;

<sup>b</sup> Ningbo Zhenhai Institute of Mass Spectrometry, Ningbo, Zhejiang 315211, China.

\* Corresponding Author

Shengrong Yu

E-mail: [yushengrong@nbu.edu.cn](mailto:yushengrong@nbu.edu.cn)

Yong-Xiang Wu

E-mail: [wuyongxiang@nbu.edu.cn](mailto:wuyongxiang@nbu.edu.cn)

Keqi Tang

E-mail: [tangkeqi@nbu.edu.cn](mailto:tangkeqi@nbu.edu.cn)

# TABLE OF CONTENTS

|                                                                          |            |
|--------------------------------------------------------------------------|------------|
| <b>1. Reagents and Materials .....</b>                                   | <b>S-3</b> |
| <b>2. Instrumentation.....</b>                                           | <b>S-3</b> |
| <b>3. Methods.....</b>                                                   | <b>S-3</b> |
| 3.1. Denaturing Polyacrylamide Gel Electrophoresis (PAGE) Assay .....    | S-3        |
| 3.2. Encapsulation Verification by Protease Digestion .....              | S-4        |
| 3.3. Fluorescence Detection of Active FTO in solution .....              | S-4        |
| 3.4. Fenton Interference Control Experiments.....                        | S-5        |
| 3.5. Release of pH-Triggered Zn <sup>2+</sup> and Fe <sup>2+</sup> ..... | S-5        |
| 3.6. Capability of •OH Generation by GF@ZD in solution .....             | S-5        |
| 3.7. Catalytic Performance of GF@ZD .....                                | S-6        |
| 3.8. Cell Culture.....                                                   | S-6        |
| 3.9. Cytotoxicity Assessment.....                                        | S-6        |
| 3.10. Intracellular •OH Detection .....                                  | S-6        |
| <b>4. Supplementary Figures and Table .....</b>                          | <b>S-7</b> |

## 1. Reagents and Materials

Glucose oxidase (GOD), sodium borohydride ( $\text{NaBH}_4$ ) and ammonium iron (II) sulfate hexahydrate ( $(\text{NH}_4)_2\text{Fe}(\text{SO}_4)_2 \cdot 6\text{H}_2\text{O}$ ) were purchased from Sigma-Aldrich. Zinc nitrate hexahydrate ( $\text{Zn}(\text{NO}_3)_2 \cdot 6\text{H}_2\text{O}$ ), nitrogen-containing ligands (2-aminobenzimidazole, 2-methylimidazole) and polymeric dispersant PVP (MW = 10,000) were purchased from Shanghai Aladdin Biochemical Technology (China). HCl, NaOH,  $\text{H}_2\text{O}_2$  and succinimidyl 4-(N-maleimidomethyl) cyclohexane-1-carboxylate (SMCC) were purchased from Shanghai Macklin Biochemical Co., Ltd (China).

All DNAs utilized in this study were purchased from Shanghai Sangon Biological Engineering Technology & Services (China) with their sequences listed in Table S1. The human embryonic kidney 293 cells (HEK-293T) and human breast cancer cells (MCF-7) were supplied by Shanghai Cell Bank of the Chinese Academy of Sciences. The reactive oxygen species fluorescent probe (DCFH-DA), live/dead cell staining kit (Calcein-AM/PI), glucose activity assay kit, and hydrogen peroxide content assay kit were all purchased from Solarbio Science & Technology Co., Ltd. (Beijing, China). Dulbecco's Modified Eagle Medium (DMEM) and fetal bovine serum (FBS) were purchased from Corning (USA). Ultrapure water (resistance  $>18 \text{ M}\Omega \text{ cm}$ ) was obtained by using a Milli-Q reference system (Billerica, MA, USA).

## 2. Instrumentation

The microstructure and morphology of  $\text{GOx-Fe}^0@\text{ZIF-8-NH}_2$  were characterized by using a scanning electron microscopy (SEM, US-70, Hitachi). Dynamic light scattering (DLS) analysis was performed by using a Malvern Zeta Sizer Nano ZS90 (London, UK). The fluorescence measurements were recorded by using a RF-6000 spectrophotometer (Shimadzu, Japan). Detection of  $\text{Zn}^{2+}$  and  $\text{Fe}^{2+}$  was performed by using an Inductively Coupled Plasma Mass Spectrometry (ICP-MS, Agilent 7800, US). Fluorescence measurements were recorded by using a RF-6000 spectrophotometer (Japan). The CCK-8 was utilized for cell quantification by the Varioskan Flash microplate reader from Thermo Fisher Scientific (China) at 450 nm. Confocal fluorescence images of cells were obtained by using a FV3000 laser-scanning confocal microscopy (Olympus, Japan). The T20S Series Thermal Cycler for Porous Plates was purchased from Long Gene (China) and the Fire-Reader V10 Gel Imager was purchased from UVITEC (UK).

## 3. Methods

### 3.1. Denaturing Polyacrylamide Gel Electrophoresis (PAGE) Assay

The demethylation of  $\text{m}^6\text{A-E}$ -strands was first performed in a 100  $\mu\text{L}$  reaction system containing 50

mM HEPES (50 mM HEPES, 100 mM NaCl, pH = 7.4), 1  $\mu$ M m<sup>6</sup>A-E-strands, FTO protein (250 nM), 283  $\mu$ M ammonium iron (II) sulfate hexahydrate, 300  $\mu$ M  $\alpha$ -ketoglutarate, 2 mM L-ascorbic acid, and 50  $\mu$ g/mL bovine serum albumin (BSA). The reaction mixture was incubated at 37 °C for 3 h. Subsequently, the process was terminated by adding 5 mM EDTA, followed by heating at 95 °C for 5 min. Then, the mixture containing FTO-treated m<sup>6</sup>A-E-strands (200 nM), S-strands (1  $\mu$ M), and Zn<sup>2+</sup> (200  $\mu$ M) was prepared in HEPES buffer (50 mM HEPES, 100 mM NaCl, pH = 7.4) and incubated at 37 °C for 3 h. After incubation, 10  $\mu$ L of the reaction mixture was combined with 2  $\mu$ L of loading buffer and loaded onto 12% denaturing polyacrylamide gel. Electrophoresis was carried out in 1 $\times$  TBE buffer at a constant voltage of 100 V for 1 h. Following electrophoresis, the gel was stained with GelRed nucleic acid dye. Fluorescence imaging was performed using a Fluor Chem FC3 imaging system (Protein Simple, USA) under 365 nm UV excitation.

### 3.2. Encapsulation Verification by Protease Digestion

To verify the encapsulation of GOx within the ZIF-8 framework, free GOx and The GOx-Fe<sup>0</sup>@ZIF-8-NH<sub>2</sub> were each incubated with proteinase K (final concentration 1 mg/mL) in HEPES buffer (50 mM HEPES, 100 mM NaCl, pH = 7.4) at 37 °C for 1 h. Untreated free GOx and The GOx-Fe<sup>0</sup>@ZIF-8-NH<sub>2</sub> incubated without proteinase K under the same conditions served as controls. After incubation, the GOx-Fe<sup>0</sup>@ZIF-8-NH<sub>2</sub> samples were centrifuged at 10,000 rpm for 10 min, and the pellets were washed twice with HEPES, then resuspended in fresh buffer. For free GOx samples, the reaction mixtures were used directly. Following the reaction, the samples were collected and analyzed for glucose oxidase activity using glucose oxidase activity test kit.

### 3.3. Fluorescence Detection of Active FTO in solution

For fluorescence assay, 200  $\mu$ L reaction mixture was prepared in HEPES buffer (50 mM, 100 mM NaCl, pH = 7.4), containing 100 nM m<sup>6</sup>A-DNAzyme (pre-treated with FTO) and GOx-Fe<sup>0</sup>@ZIF-8-NH<sub>2</sub>+S-substrates. Fluorescence signals were acquired using RF-6000 fluorescence spectrophotometer. Emission spectra from 560 to 700 nm were recorded under an excitation wavelength of 540 nm. Additionally, time-dependent maximum change in fluorescence intensity were monitored at a fixed emission wavelength of 565 nm.

To verify the specific recognition capability of the constructed detection system for FTO protein, experiments were performed as follows. First, a series of 100  $\mu$ L reaction systems were prepared. Each contained the basic components required for the demethylation reaction: 50 mM HEPES buffer (pH =

7.4), 1  $\mu\text{M}$   $\text{m}^6\text{A}$ -modified DNAzyme strand ( $\text{m}^6\text{A}$ -E strand), 283  $\mu\text{M}$   $(\text{NH}_4)_2\text{Fe}(\text{SO}_4)_2 \cdot 6\text{H}_2\text{O}$ , 300  $\mu\text{M}$   $\alpha$ -ketoglutarate, 2 mM L-ascorbic acid, and 50  $\mu\text{g}/\text{mL}$  BSA. Subsequently, different testing proteins and small molecules were added to each reaction system, specifically including: 250 nM FTO protein (positive control group), 200 nM thrombin, 200 nM immunoglobulin G (IgG), 50  $\mu\text{g}/\text{mL}$  BSA, and 200 nM glucose oxidase (GOD). A blank control group without any protein or small molecule was also set up. All reaction systems were incubated at 37  $^\circ\text{C}$  for 3 h. After incubation, the reaction was terminated by adding 5 mM EDTA, followed by heating at 95 $^\circ\text{C}$  for 5 min. Then, the above solution was incubated with  $\text{GOx-Fe}^0@\text{ZIF-8-NH}_2+\text{S}$ -substrates at 37  $^\circ\text{C}$  for 0.5 h. After the reaction, the product was collected by centrifugation, washed, and then incubated in HEPES (50 mM HEPES, 100 mM NaCl, pH = 6.5) buffer at 37  $^\circ\text{C}$  for 3 h. Finally, the fluorescence recovery signals of each group were detected using a fluorometer, and the specific response capability of the detection system to FTO protein was evaluated by comparing the fluorescence intensities of the positive control group with those of each test group.

### 3.4. Fenton Interference Control Experiments

To exclude potential interference from the Fenton reaction, the following five groups were compared under identical conditions (HEPES buffer, 50 mM HEPES, 100 mM NaCl, pH = 6.5, 37  $^\circ\text{C}$ ): (1) free  $\text{m}^6\text{A}$ -DNAzyme; (2) free  $\text{m}^6\text{A}$ -DNAzyme+ $\text{Fe}^{2+}$  (5  $\mu\text{M}$ ) +  $\text{H}_2\text{O}_2$  (2 mM); (3)  $\text{GF@ZD}$ ; (4)  $\text{GF@ZD}+\text{H}_2\text{O}_2$  (2 mM); (5)  $\text{GF@ZD}+\text{FTO}$  (250 nM). After incubation for 3 h, the fluorescence intensity of Cy3 ( $\lambda_{\text{ex}} = 540$  nm,  $\lambda_{\text{em}} = 560 \sim 700$  nm) was recorded using a fluorescence spectrophotometer.

### 3.5. Release of pH-Triggered $\text{Zn}^{2+}$ and $\text{Fe}^{2+}$

The material was dispersed in 15 mL of PBS buffer solutions at different pH values (5.4, 6.5, 7.4) and continuously incubated at 37  $^\circ\text{C}$  under shaking at 100 rpm. At predetermined time intervals (0, 1, 2, 4, 8, 12, 24, and 48 h), samples were collected and centrifuged at 10,000 rpm. 2 mL aliquot of the supernatant was taken for  $\text{Zn}^{2+}$  and  $\text{Fe}^{2+}$  concentration measurement. The concentration of ions was quantitatively analyzed using an inductively coupled plasma mass spectrometry (ICP-MS).

### 3.6. Capability of $\bullet\text{OH}$ Generation by $\text{GF@ZD}$ in solution

The capacity of  $\text{GF@ZD}$  to generate hydroxyl radicals ( $\bullet\text{OH}$ ) under varying pH conditions was assessed *in vitro* by monitoring the degradation of methylene blue (MB). The reaction system was established by dispersing the nano-system in PBS buffers at different pH values (5.4, 6.5, 7.4), followed by the addition of 10  $\mu\text{g}/\text{mL}$  MB and 40.0 mM  $\text{H}_2\text{O}_2$ . The extent of  $\bullet\text{OH}$ -induced oxidative degradation was evaluated using an ultraviolet-visible (UV-Vis) spectrophotometry by measuring the decrease in the characteristic absorption peak of MB at 660 nm. The absorbance at 660 nm was continuously recorded

over 60 min reaction period to plot the degradation kinetics, thereby providing an analysis of the •OH generation dynamics.

### 3.7. Catalytic Performance of GF@ZD

To assess the effect of glucose concentration on the catalytic performance of GF@ZD, the GF@ZD (10 µg/mL) was incubated with a series of glucose solutions at varying concentrations (0, 200, 400, 600, 800, and 1000 µg/mL). Following the reaction, the samples were collected and analyzed for glucose oxidase activity and hydrogen H<sub>2</sub>O<sub>2</sub> production using assay kits (a glucose oxidase activity test kit and a H<sub>2</sub>O<sub>2</sub> assay kit), respectively.

### 3.8. Cell Culture

MCF-7 cells and HEK-293T cells were cultured in DMEM supplemented with 10.0% fetal bovine serum and 1.0% penicillin-streptomycin, and maintained in a humidified incubator at 37 °C with 5.0% CO<sub>2</sub>.

### 3.9. Cytotoxicity Assessment

MCF-7 cells were seeded in 96-well plates (5.0 × 10<sup>4</sup> cells/mL, 100 µL/well) and cultured for 24 h. The medium was then replaced with DMEM containing various concentrations (0, 20, 40, 60, 90, and 120 µg/mL) of ZIF-8, GOx-ZIF-8, GOx-Fe<sup>0</sup>@ZIF-8-NH<sub>2</sub>, or GF@ZD, and the cells were incubated for another 24 h. After washing three times with PBS, 100 µL of DMEM containing 10 µL of CCK-8 reagent was added to each well. Following a 4 h incubation, cell viability was assessed by measuring the absorbance at 450 nm using a microplate reader.

### 3.10. Intracellular •OH Detection

Intracellular •OH generation was assessed using the DCFH-DA probe. MCF-7 cells were treated with ZIF-8, GOx@ZIF-8, or GF@ZD (90 µg/mL) for 6 h, followed by incubation with 10 µM DCFH-DA for 30 min. After washing with PBS to remove excess probe, fluorescence was visualized by fluorescence microscopy ( $\lambda_{\text{ex}} = 488 \text{ nm}$ ,  $\lambda_{\text{em}} = 500 \sim 600 \text{ nm}$ ).

#### 4. Supplementary Figures and Table

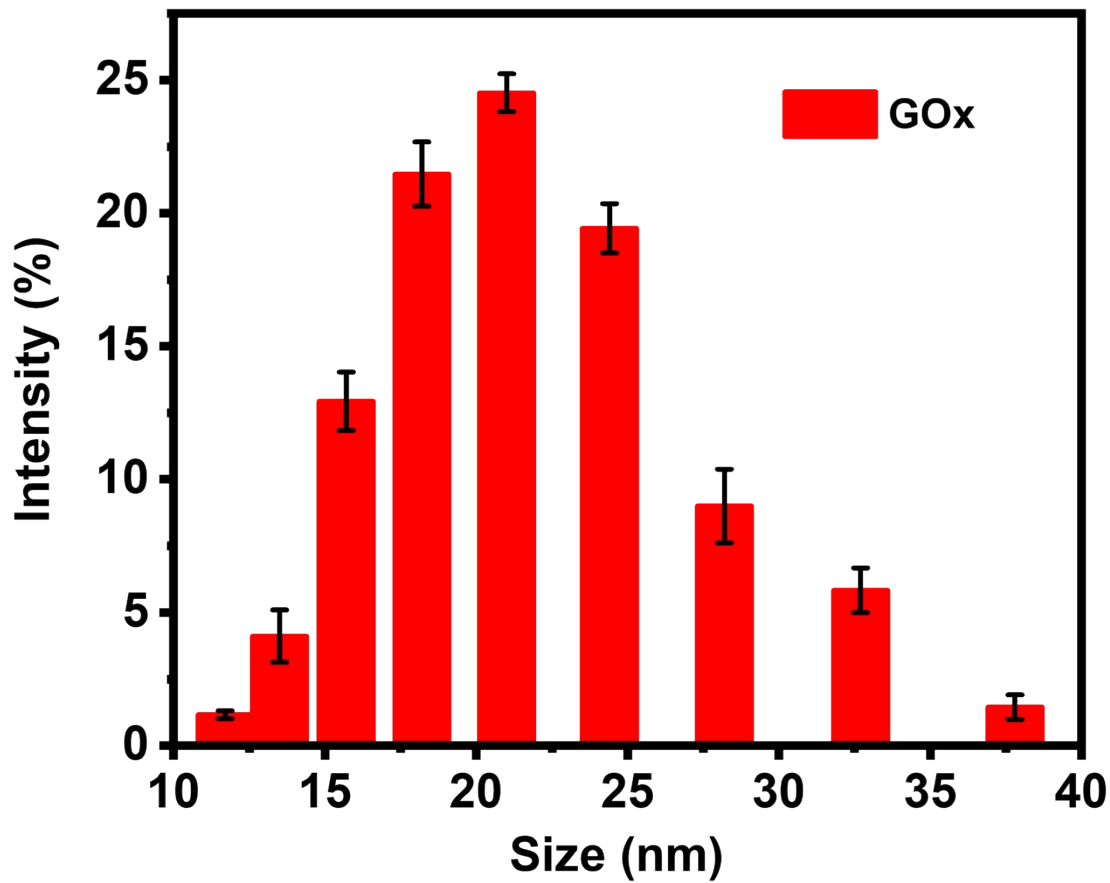

Fig. S1 DLS analysis of GOx; data are represented as means  $\pm$  SD, n = 3.

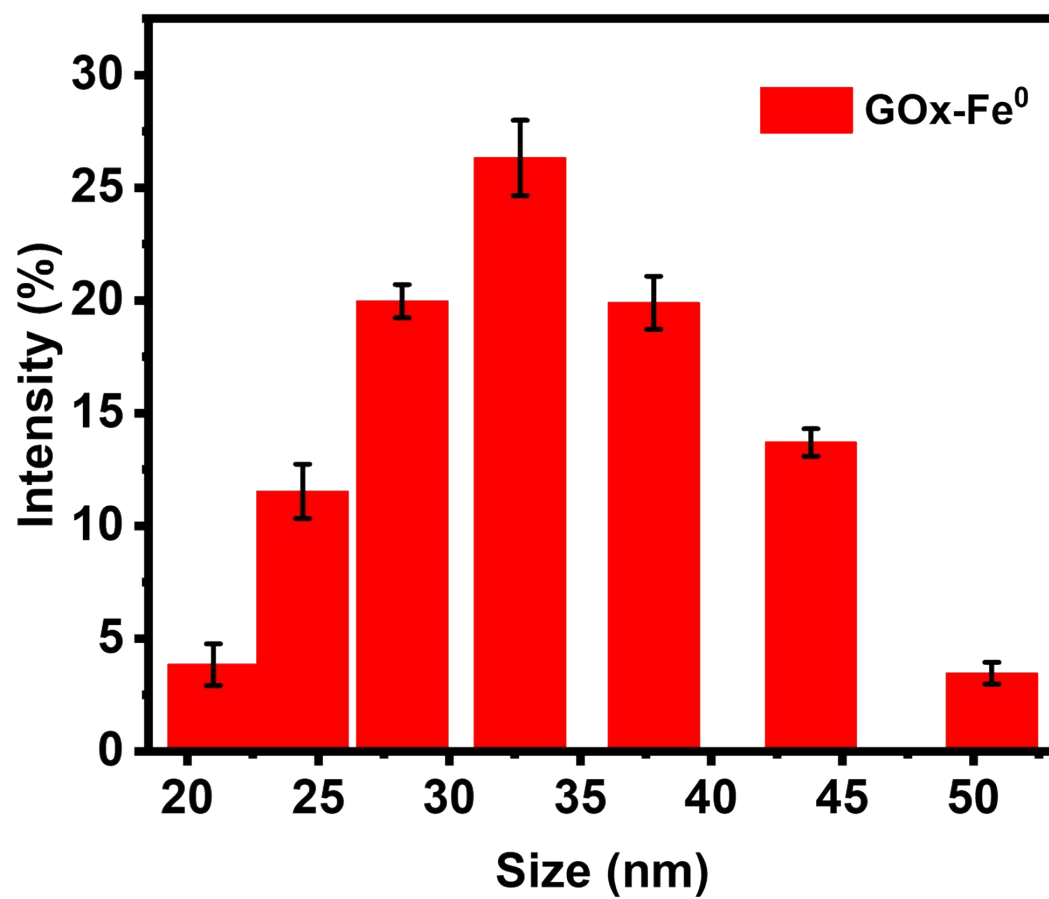

Fig. S2 DLS analysis of GOx-Fe<sup>0</sup>; data are represented as means  $\pm$  SD, n = 3.

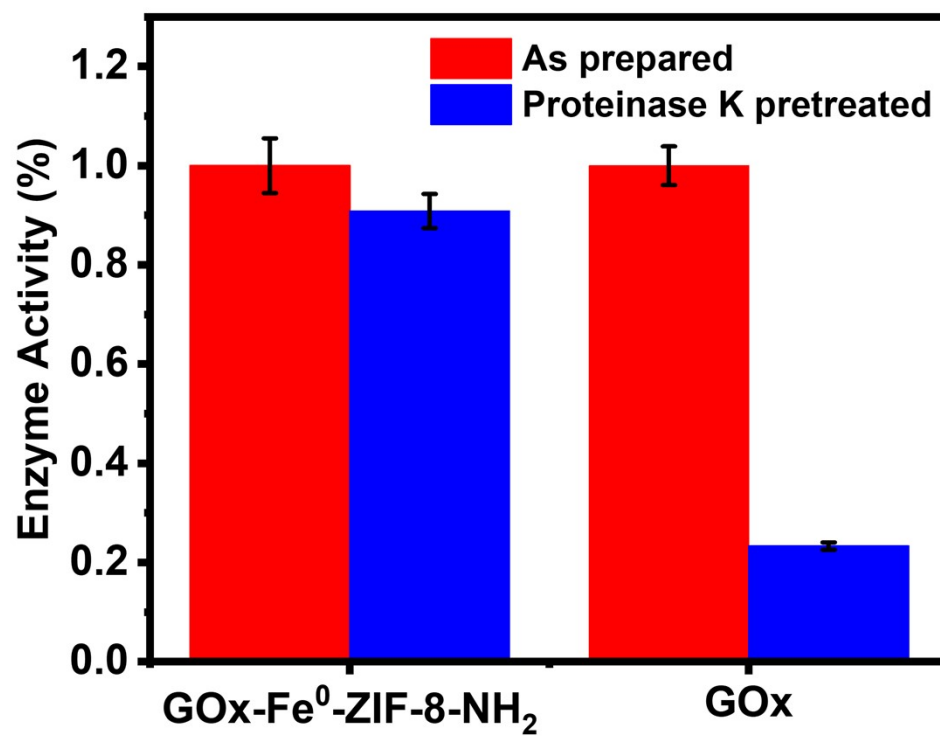

**Fig. S3** Encapsulation verification of GOx by protease digestion. Relative enzymatic activity of free GOx and GOx-Fe<sup>0</sup>@ZIF-8-NH<sub>2</sub> before and after treatment with proteinase K (1 mg/mL, 37 °C, 1 h). The activity of each untreated sample (as-prepared) was set as 100%; data are represented as means ± SD, n = 3

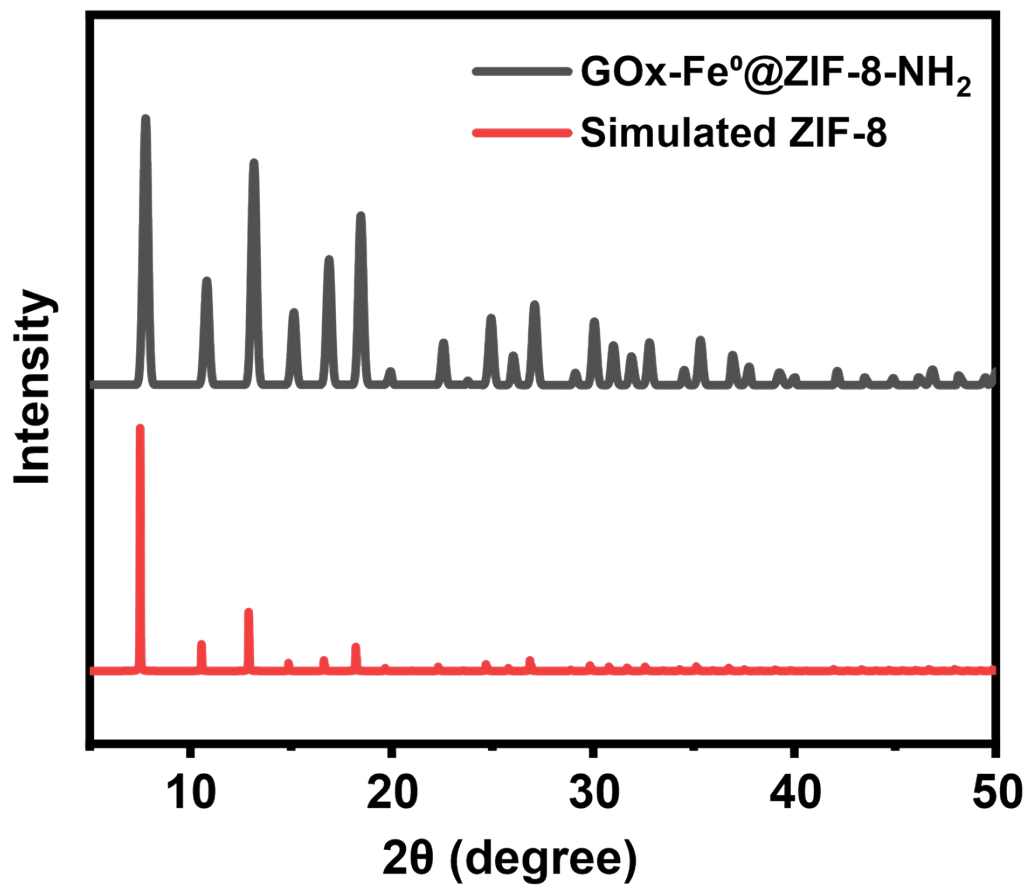

Fig. S4 XRD patterns of GOx-Fe<sup>0</sup>@ZIF-8-NH<sub>2</sub> (black), simulated ZIF-8 (red).

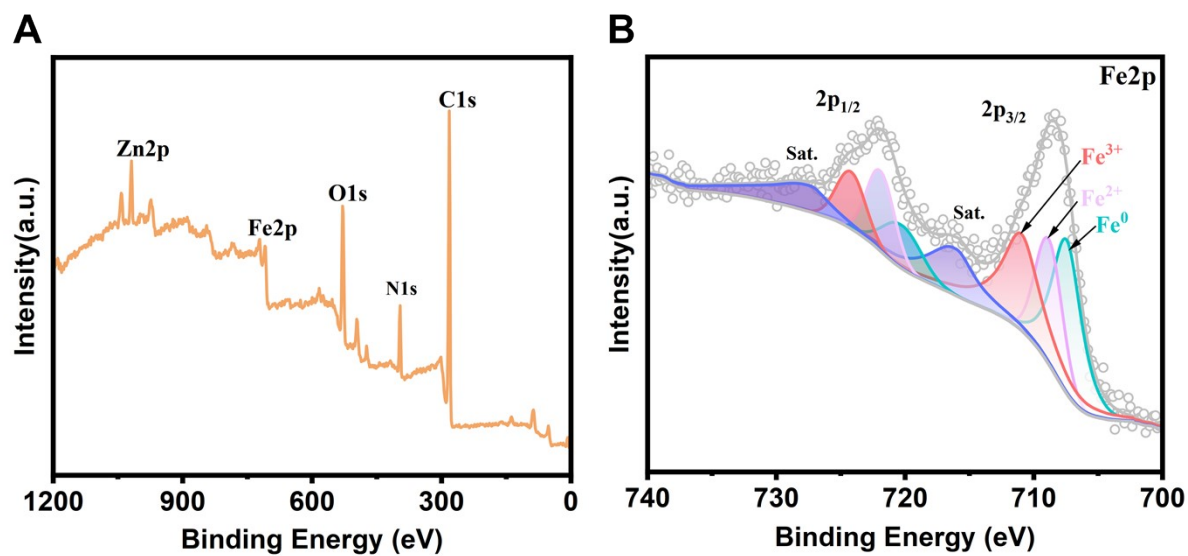

**Fig. S5** XPS spectra of the GOx-Fe<sup>0</sup>@ZIF-8-NH<sub>2</sub> nanocomposite. (A) The survey spectrum reveals the presence of C, N, O, Fe, and Zn elements. (B) The high-resolution Fe 2p spectrum confirms the existence of Fe<sup>0</sup> species along with Fe<sup>2+</sup>/Fe<sup>3+</sup> species resulting from surface oxidation.

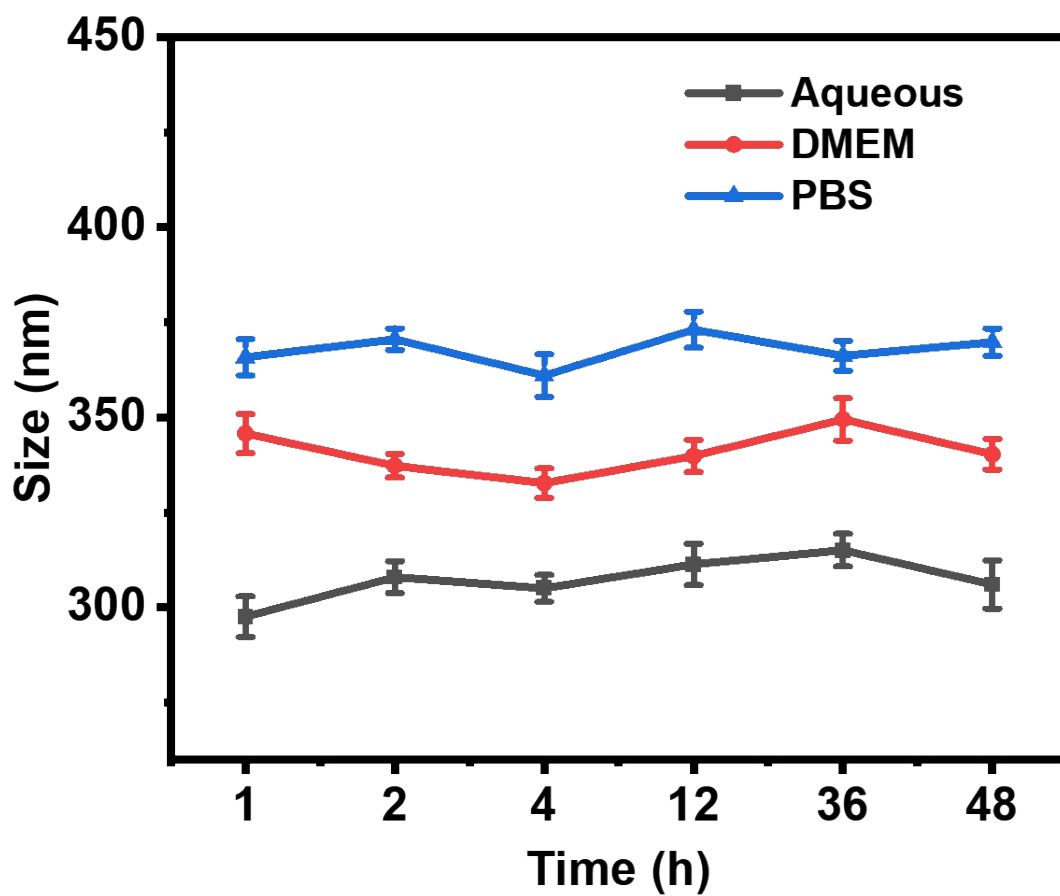

**Fig. S6** The stability (sizes change) of the GOx-Fe<sup>0</sup>@ZIF-8-NH<sub>2</sub> (1 mg/mL) in different solution (aqueous, DMEM, PBS (10 mM), pH = 7.4); data are represented as means ± SD, n = 3.

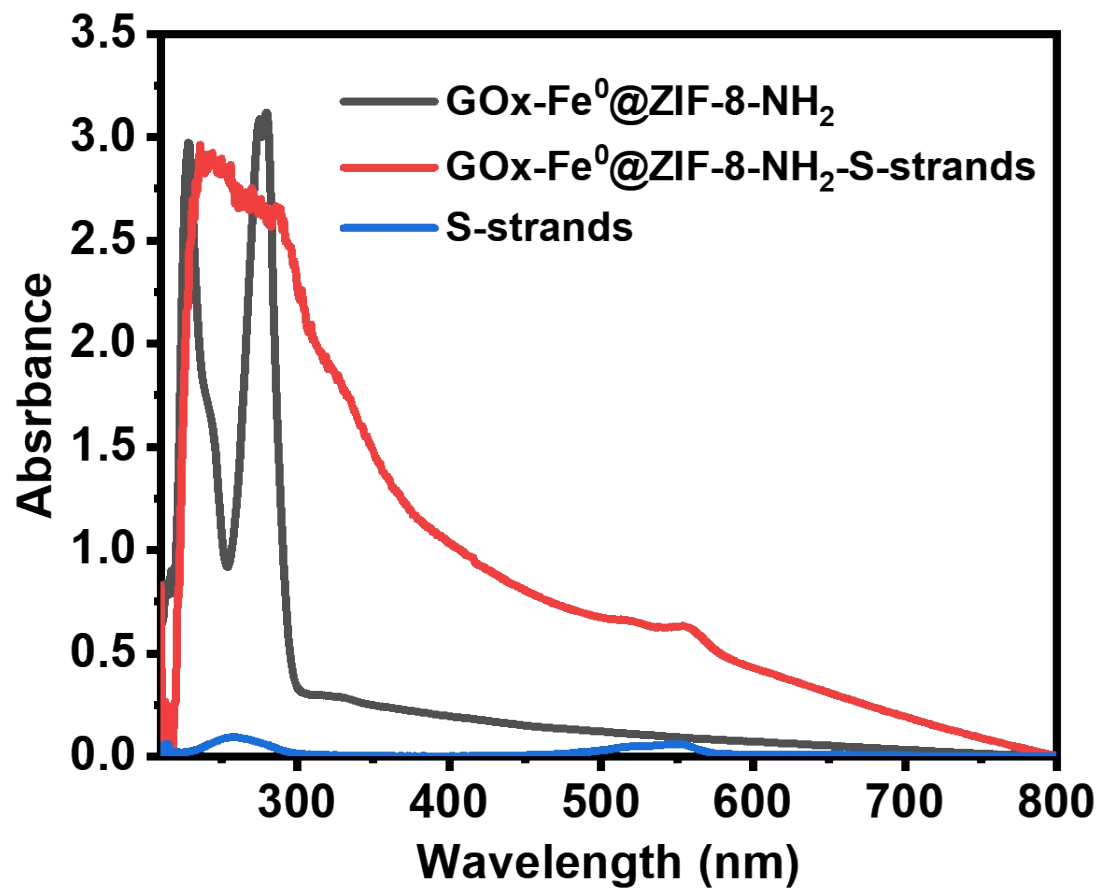

**Fig. S7** The UV-vis absorption spectrum of GOx-Fe<sup>0</sup>@ZIF-8-NH<sub>2</sub>, GOx-Fe<sup>0</sup>@ZIF-8-NH<sub>2</sub>-S-strands, S-strands.

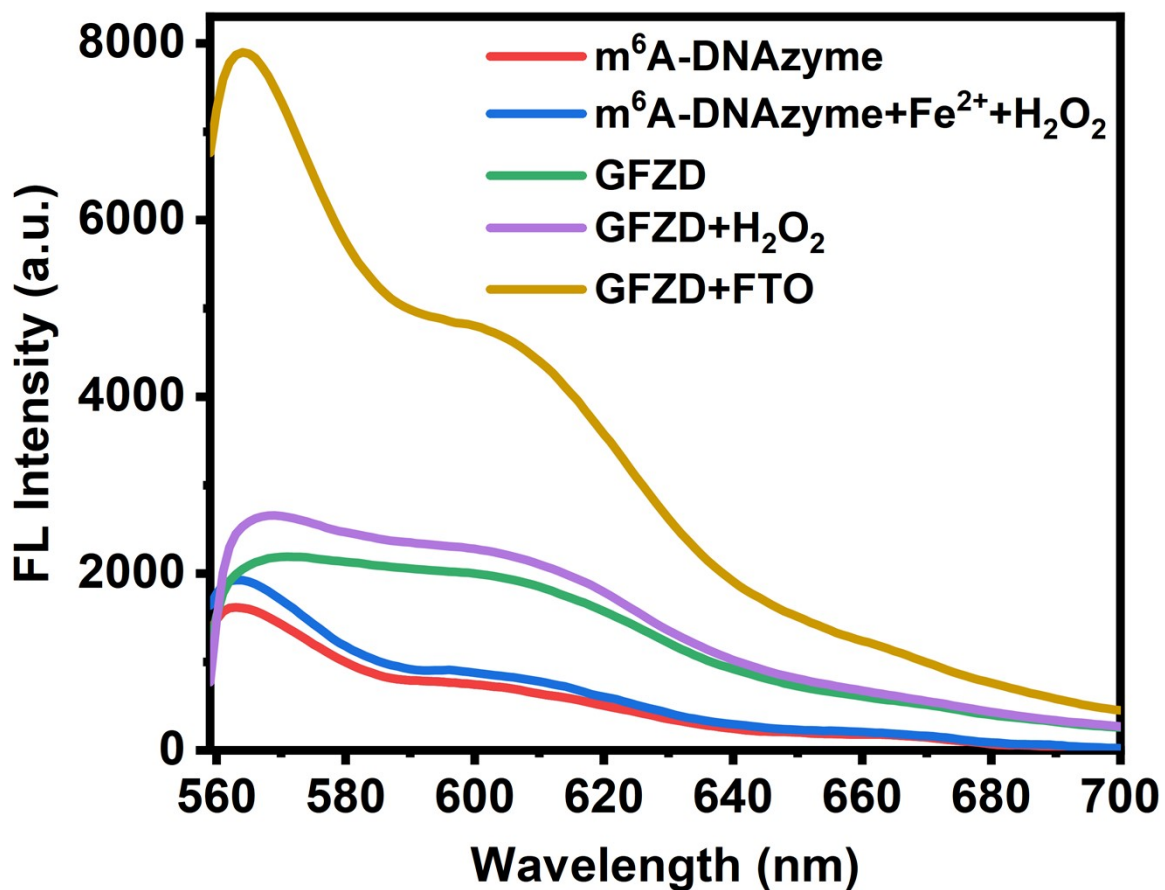

**Fig. S8** Exclusion of Fenton reaction interference. Relative fluorescence intensity of Cy3 in different control groups: (1) free m<sup>6</sup>A-DNAzyme (red line), (2) free m<sup>6</sup>A-DNAzyme+Fe<sup>2+</sup>+H<sub>2</sub>O<sub>2</sub> (blue line), (3) GF@ZD (green line), (4) GF@ZD+H<sub>2</sub>O<sub>2</sub>, (purple line) and (5) GF@ZD+FTO (yellow line); data are represented as means ± SD, n = 3.

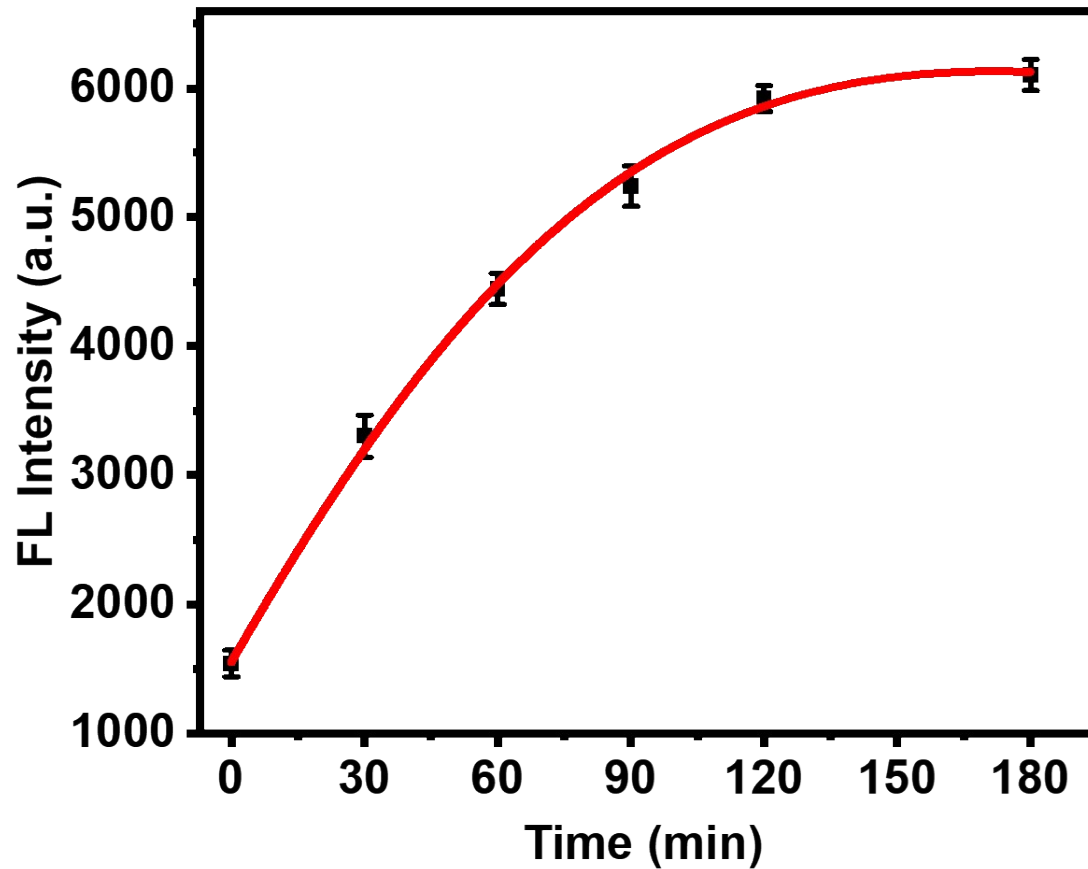

**Fig. S9** The fluorescence intensity of GF@ZD (0.125  $\mu\text{g}/\text{mL}$ ) response to FTO (250 nM) under different time in HEPES buffer (50 mM HEPES, 100 mM NaCl, pH = 6.5); data are represented as means  $\pm$  SD, n = 3.

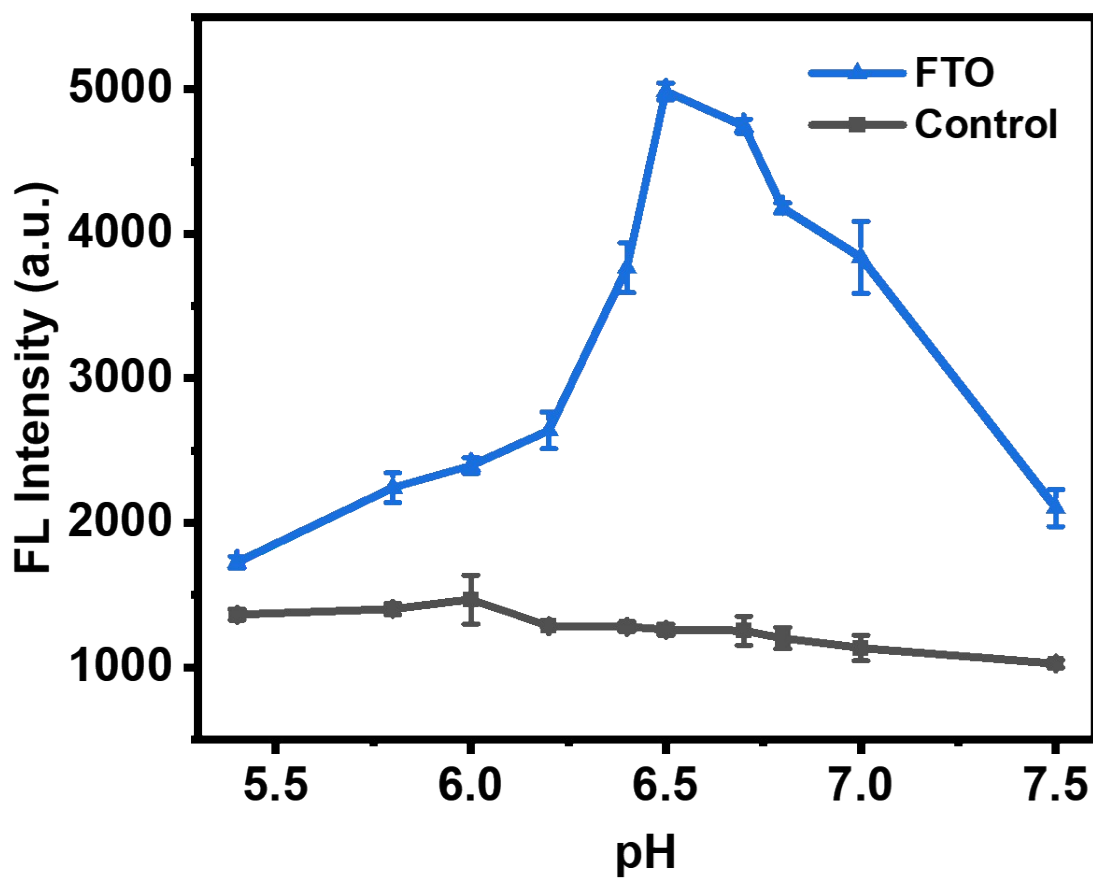

**Fig. S10** The fluorescence intensity of FTO treated GF@ZD (0.125  $\mu\text{g}/\text{mL}$ ) and untreated (Control) for different pH in HEPES buffer (50 mM HEPES, 100 mM NaCl); data are represented as means  $\pm$  SD, n = 3.

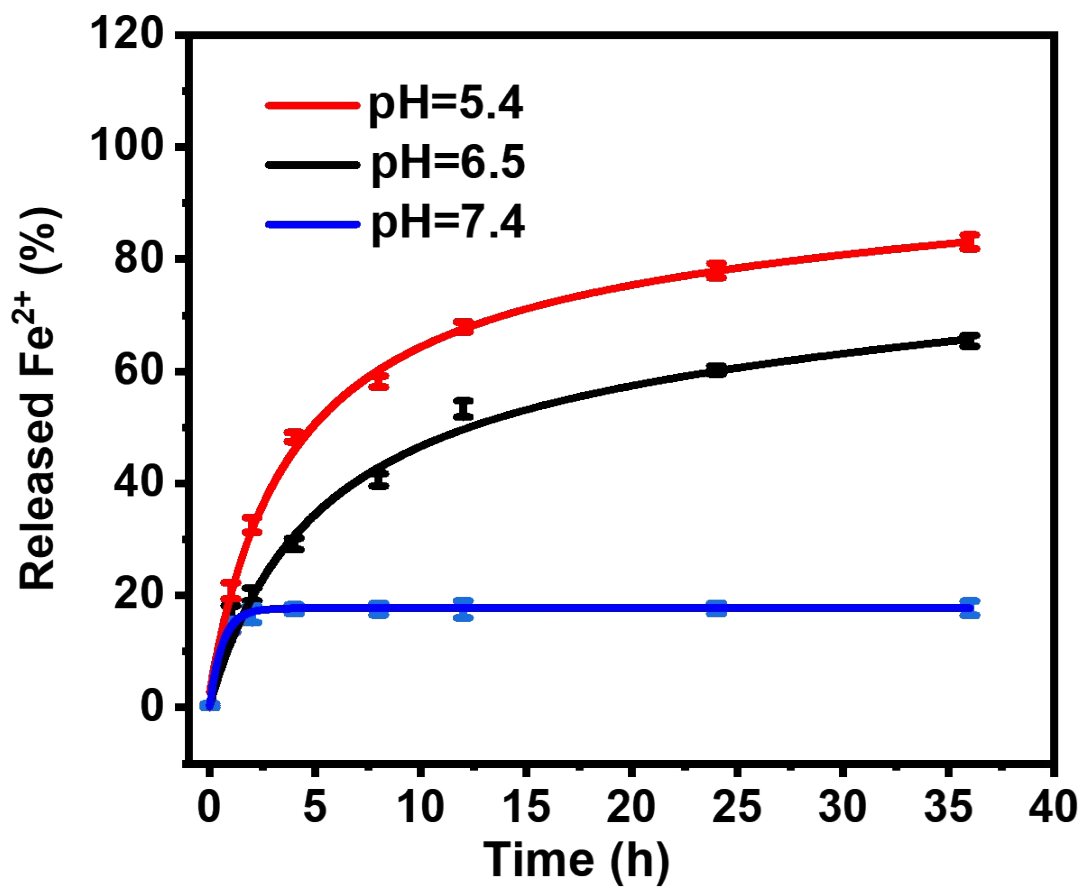

**Fig. S11** The release of Fe<sup>2+</sup> from GF@ZD at different pH by ICP-MS analysis; data are represented as means  $\pm$  SD, n = 3.

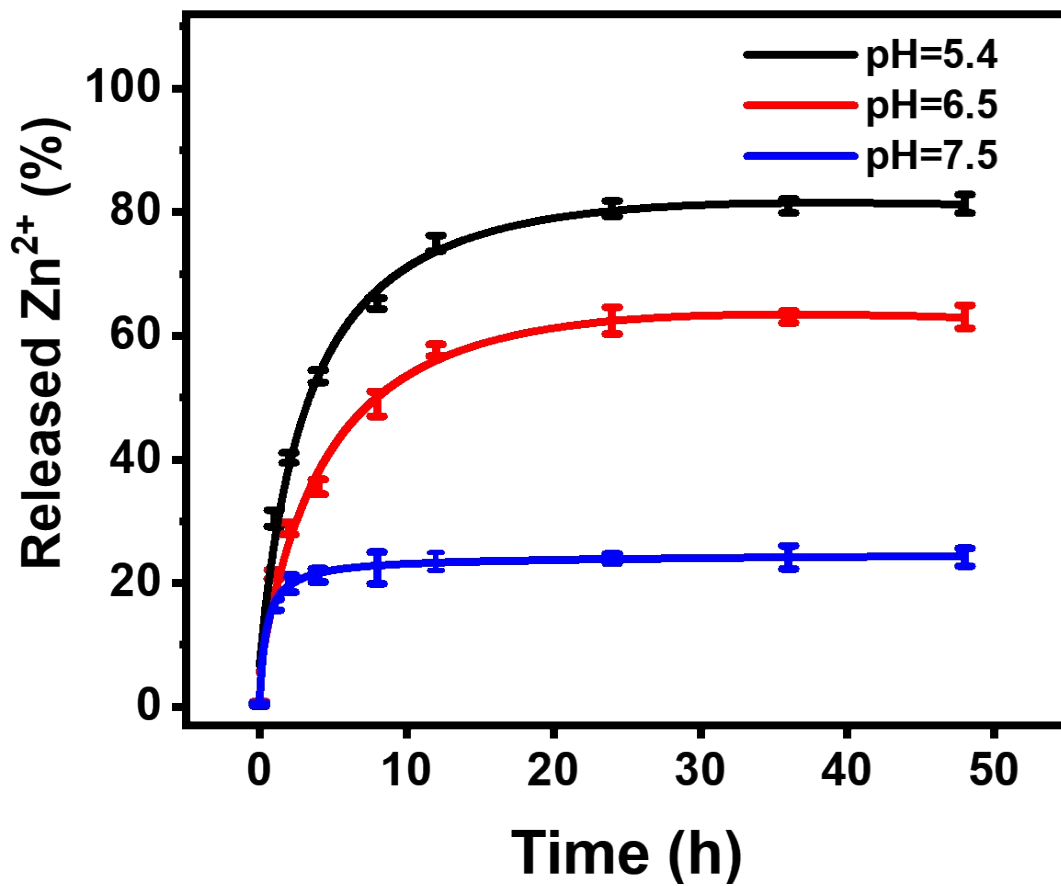

**Fig. S12** The release of Zn<sup>2+</sup> from GF@ZD at different pH by ICP-MS analysis; data are represented as means  $\pm$  SD, n = 3.

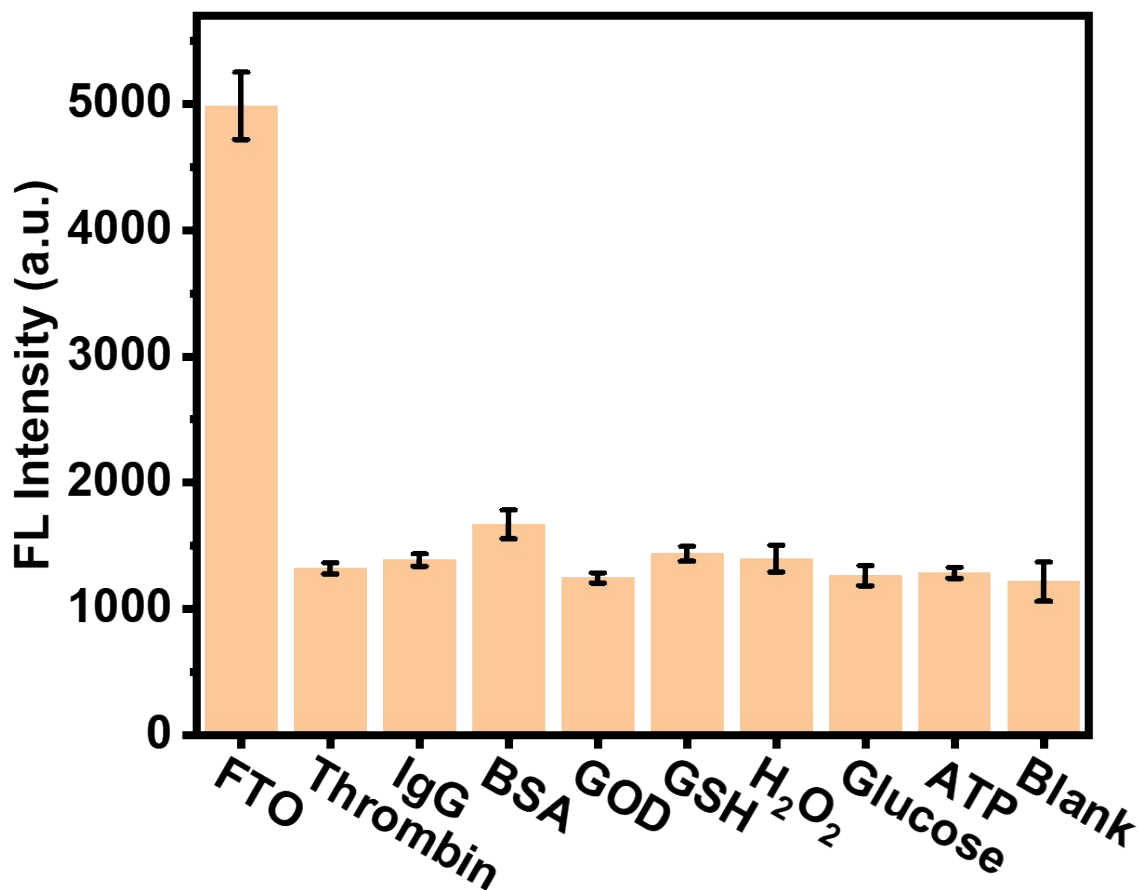

**Fig. S13** The histogram of fluorescence intensity of GF@ZD (0.125  $\mu\text{g}/\text{mL}$ ) response to different species in HEPES buffer (50 mM HEPES, 100 mM NaCl, pH = 6.5), including 250 nM FTO, 200 nM thrombin, 200 nM IgG, 50  $\mu\text{g}/\text{mL}$  BSA, 200 nM GOD, 5 mM GSH, 100  $\mu\text{M}$  H<sub>2</sub>O<sub>2</sub>, 2 mM glucose and 5 mM ATP;  $\lambda_{\text{ex}} = 540 \text{ nm}$ ,  $\lambda_{\text{em}} = 560 \sim 700 \text{ nm}$ ; data are represented as means  $\pm$  SD, n = 3.

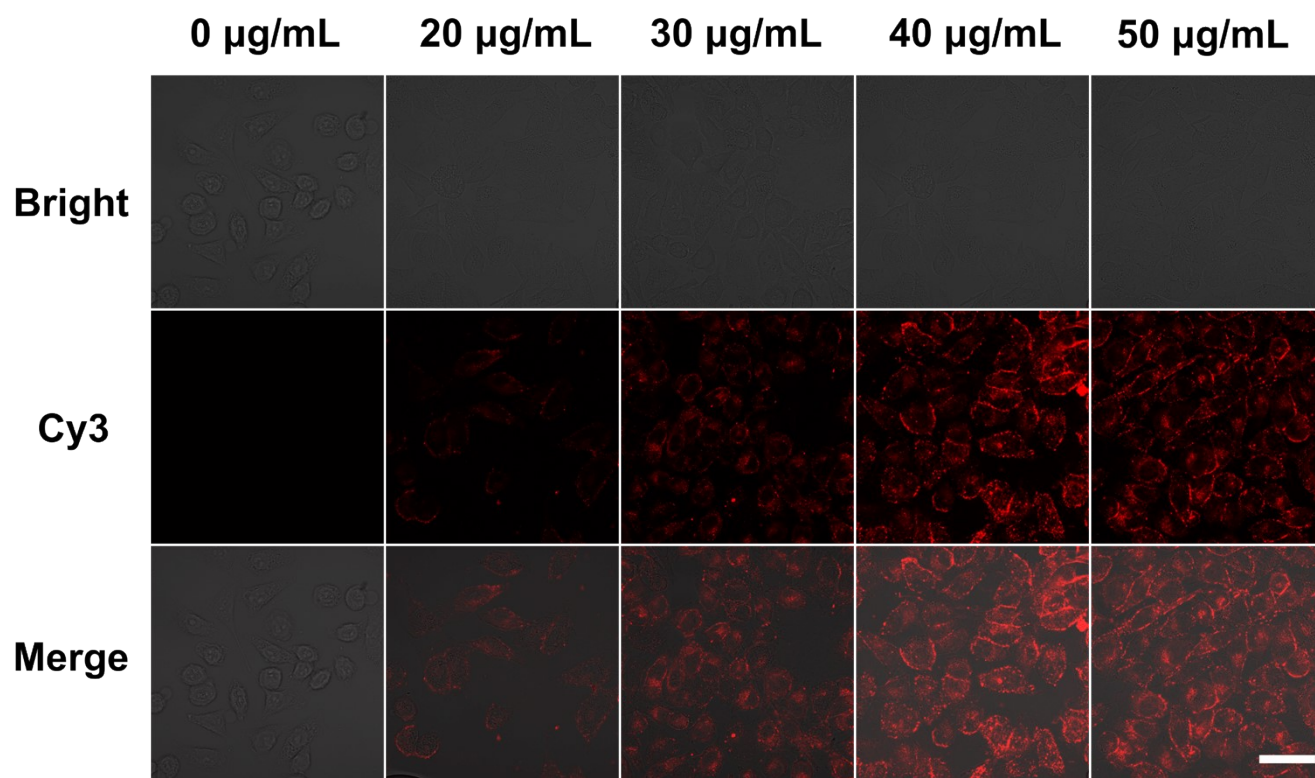

**Fig. S14** Confocal fluorescence bioimaging of MCF-7 cells with GF@ZD for various concentration at 37 °C for 6 h;  $\lambda_{\text{ex}} = 561 \text{ nm}$ ;  $\lambda_{\text{em}} = 570 \sim 620 \text{ nm}$ ; the scale bar is 50  $\mu\text{m}$ .

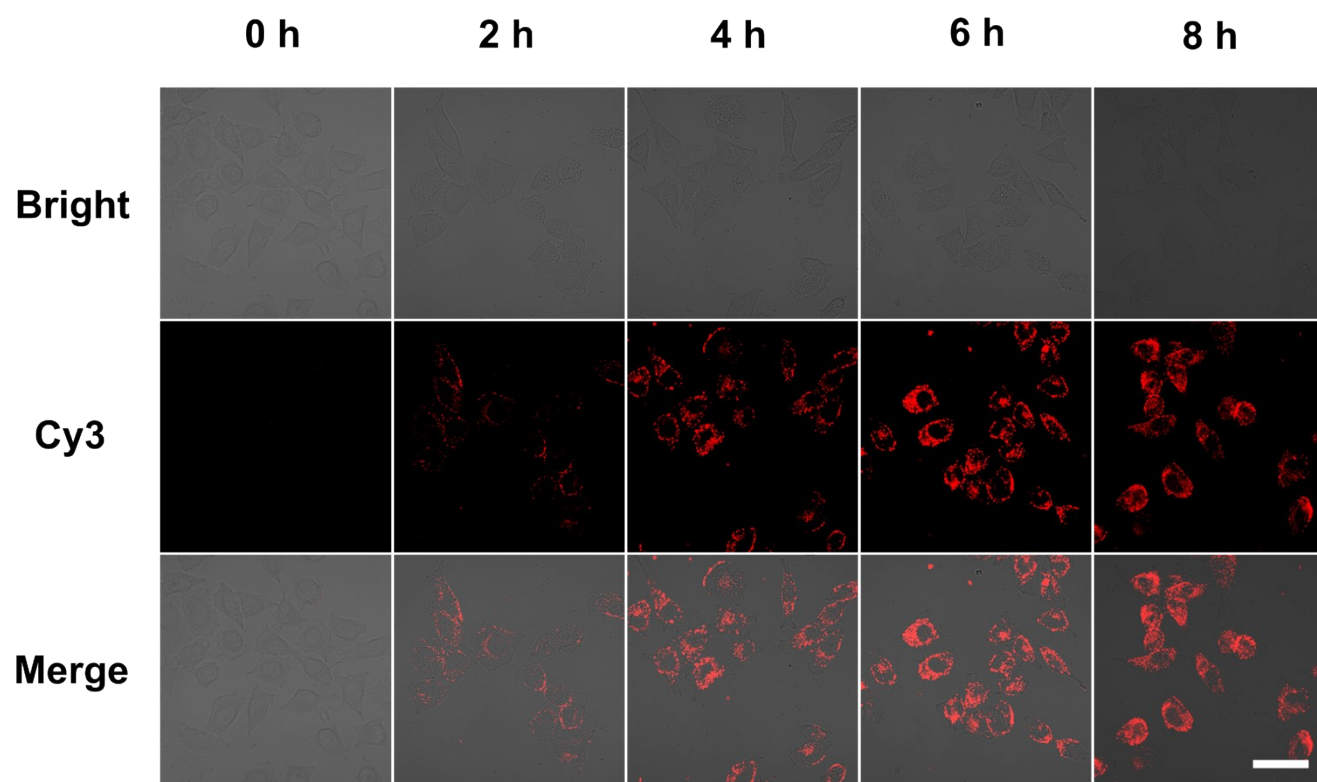

**Fig. S15** Confocal fluorescence bioimaging of MCF-7 cells with GF@ZD (50 nM) at various time at 37 °C;  $\lambda_{\text{ex}} = 561 \text{ nm}$ ;  $\lambda_{\text{em}} = 570 \sim 620 \text{ nm}$ ; the scale bar is 50  $\mu\text{m}$ .

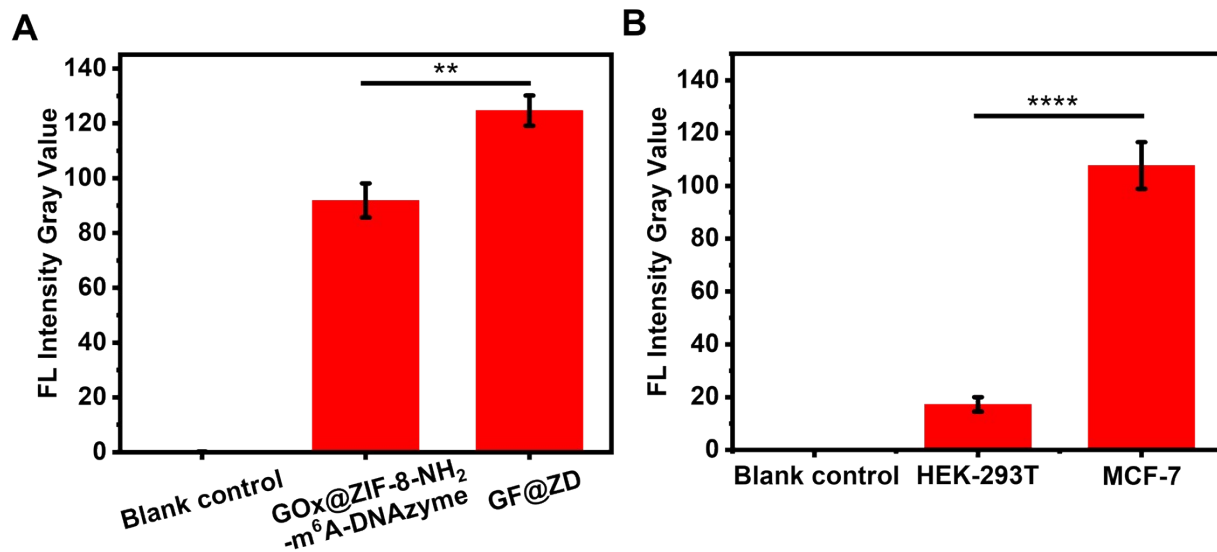

**Fig. S16** (A) Histogram of the corresponding fluorescence intensity values in Fig. 4 with ImageJ software. (B) Histogram of the corresponding fluorescence intensity values in Fig. 5 with ImageJ software. Data are represented as means  $\pm$  SD,  $n = 3$ . \* $P < 0.05$ , \*\* $P < 0.01$ , \*\*\* $P < 0.001$ , and \*\*\*\* $P < 0.0001$ .

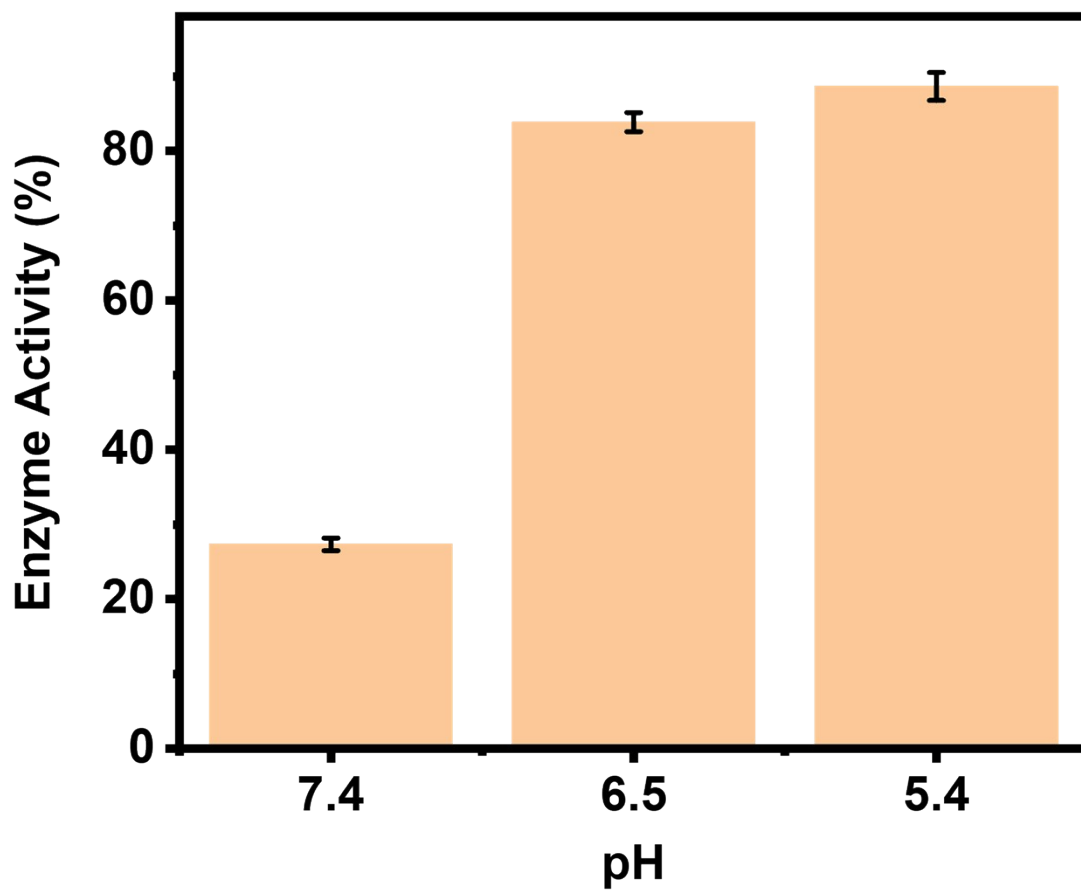

**Fig. S17** The relative enzymatic activity of GOx from GF@ZD at different pH by glucose oxidase activity test kit; data are represented as means  $\pm$  SD, n = 3.

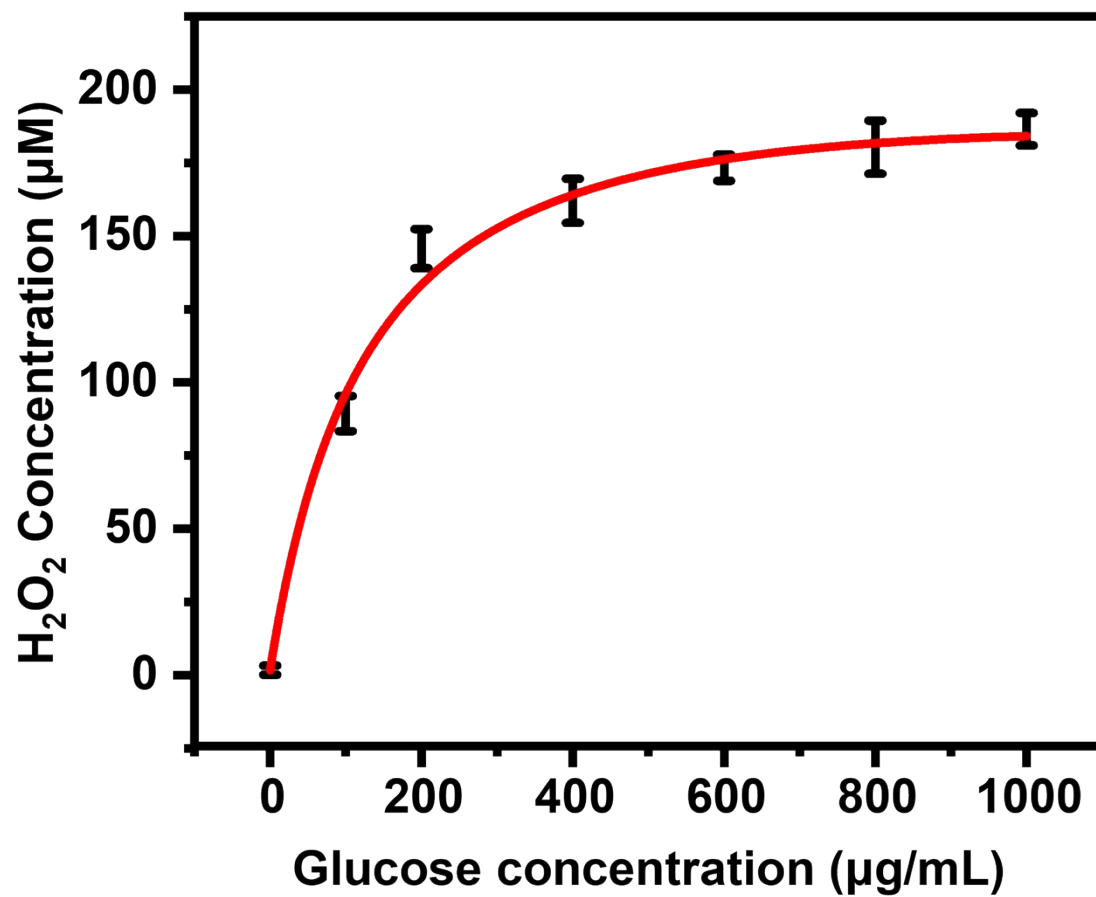

**Fig. S18** Variation of the H<sub>2</sub>O<sub>2</sub> concentration of GF@ZD after 4 h of incubation with different concentrations of glucose by H<sub>2</sub>O<sub>2</sub> assay kit; data are represented as means ± SD, n = 3.

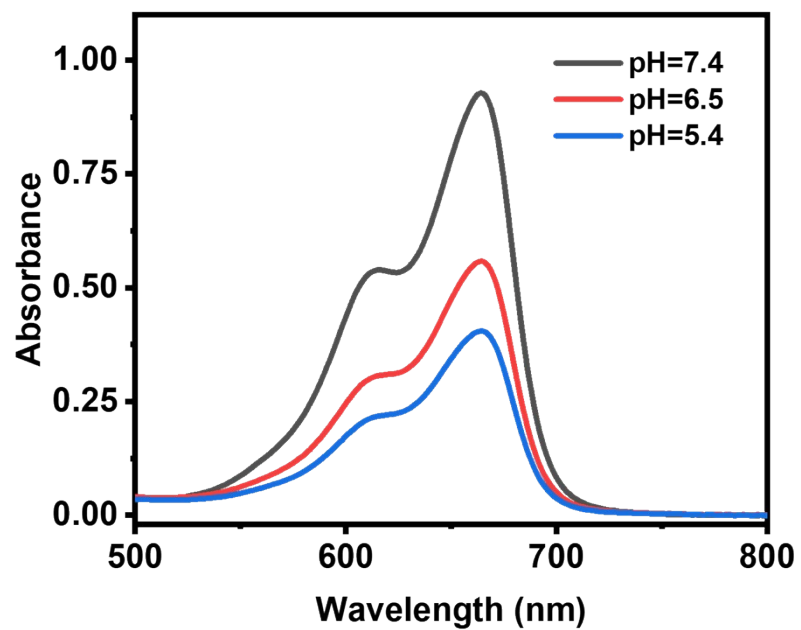

**Fig. S19** The UV-vis absorption spectrum of  $\bullet\text{OH}$  generated from methylene blue degradation at different pH by GF@ZD.

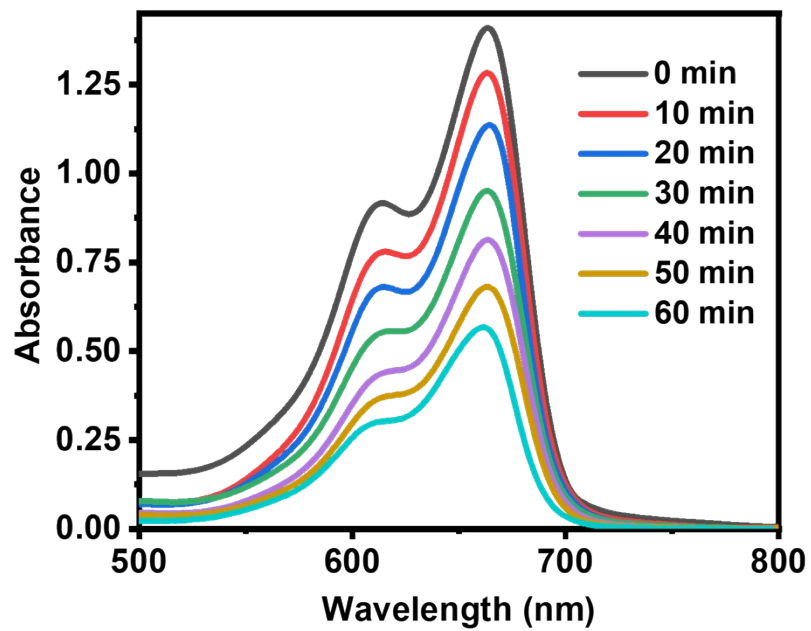

**Fig. S20** The UV-vis absorption spectrum of  $\bullet\text{OH}$  generated from methylene blue degradation by GF@ZD for different time periods.

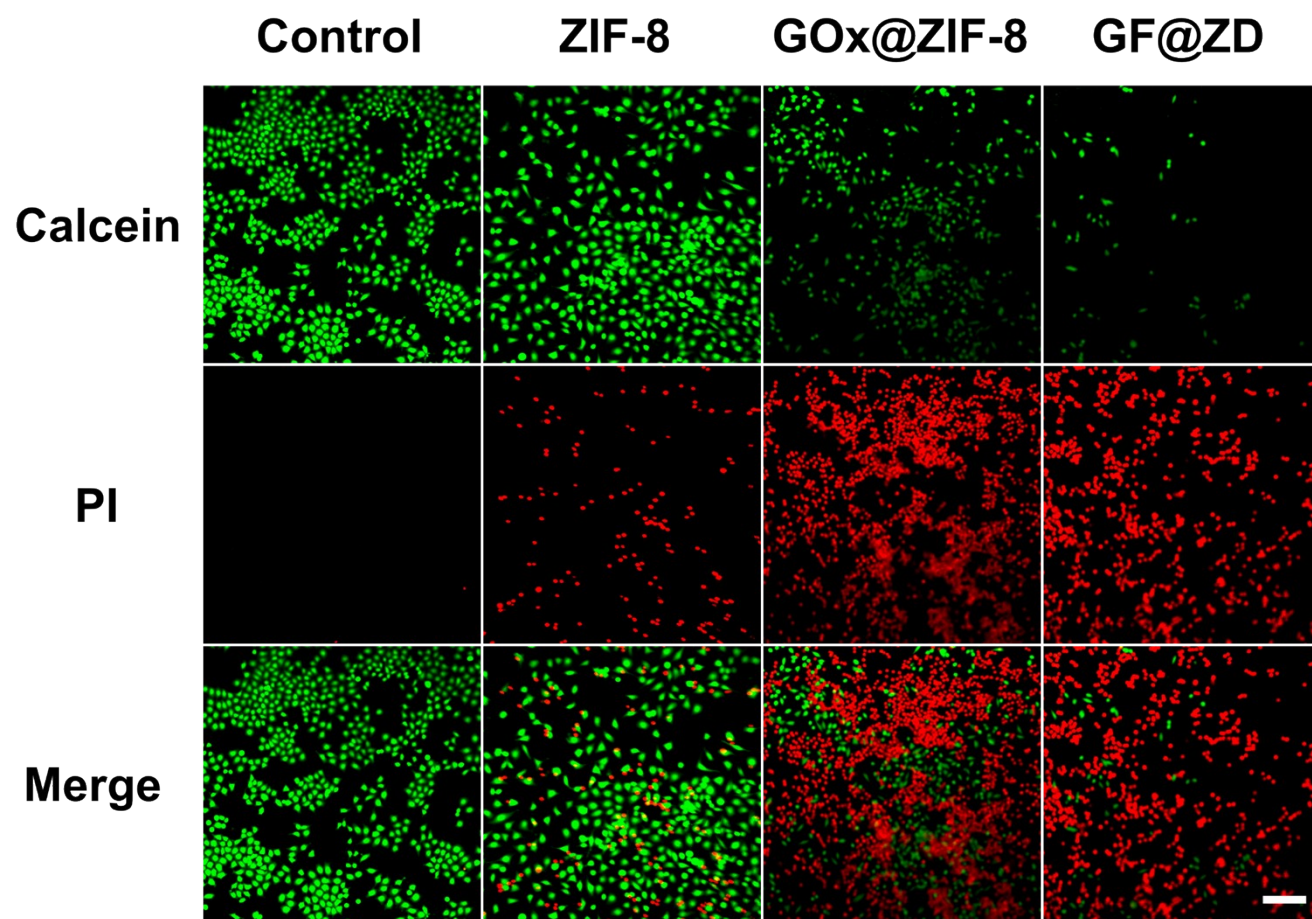

**Fig. S21** Confocal fluorescence bioimaging of calcein-AM/PI co-stained MCF-7 cells after incubation with ZIF-8 (90  $\mu\text{g}/\text{mL}$ ), GOx@ZIF-8 (90  $\mu\text{g}/\text{mL}$ ) and GF@ZD (90  $\mu\text{g}/\text{mL}$ );  $\lambda_{\text{ex}} = 488 \text{ nm}$ ,  $\lambda_{\text{em}} = 500 \sim 540$ ;  $\lambda_{\text{ex}} = 561 \text{ nm}$ ;  $\lambda_{\text{em}} = 570 \sim 670\text{nm}$ ; the scale bar is 200  $\mu\text{m}$ .

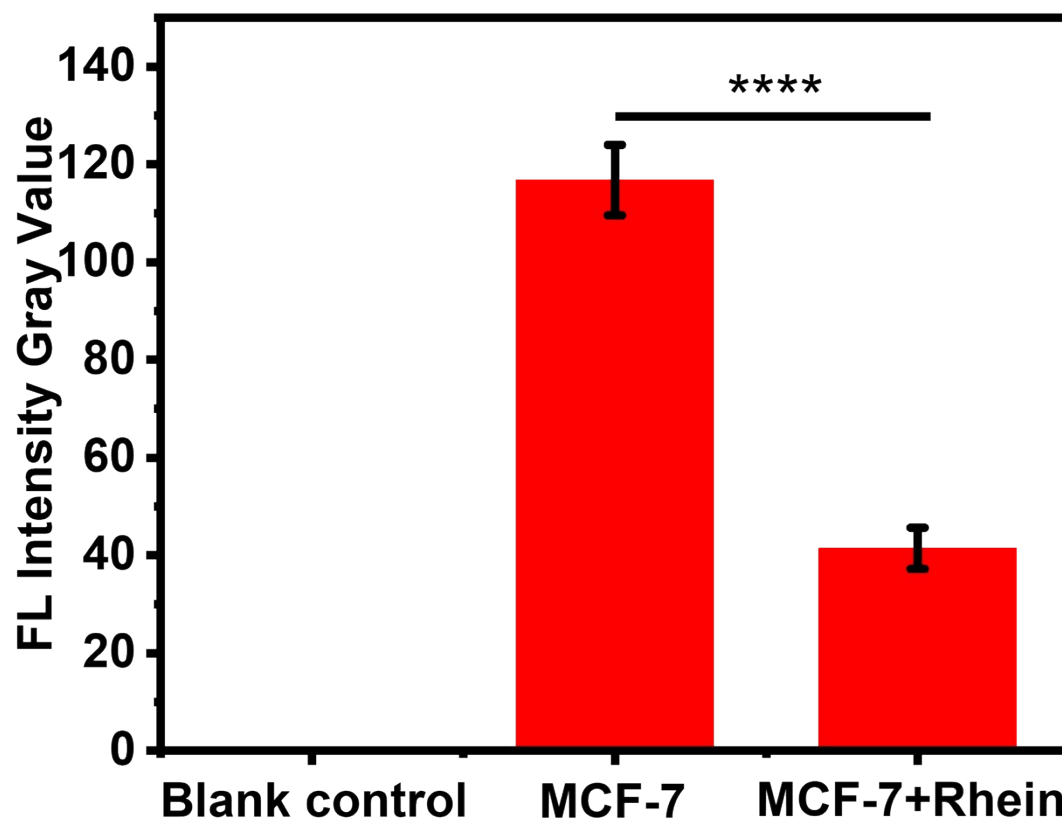

**Fig. S22** Histogram of the corresponding fluorescence intensity values in Fig. 8 with ImageJ software; data are represented as mean  $\pm$  SD, n = 3. \*P < 0.05, \*\*P < 0.01, \*\*\*P < 0.001, and \*\*\*\*P < 0.0001.

**Table S1.** All oligonucleotides used in this study.

| <b>Name</b>               | <b>Sequence (5'-3')</b>                          |
|---------------------------|--------------------------------------------------|
| S-strand                  | S-S-TGGCCAC/iBHQ2dT/ATrAGGG/iCy3/AGAGAT          |
| E-strand                  | ATCTCTCCTCCGAGCCGGTCGAAATAGTGGCCA                |
| m <sup>6</sup> A-E-strand | ATCTCTCCTCCGA <sup>Me</sup> GCCGGTCGAAATAGTGGCCA |

rA: ribonucleotide, A<sup>Me</sup>: m<sup>6</sup>A-modified nucleotides.
